# Supplementary material for: Modularization of the Learning Architecture : Supporting Learning Theories by Learning Technologies
Source: Springer Nature journal article supplement (doi:10.1007/s12350-019-01737-5), 2008-01-01
Supplement: MOESM1 [file 16729018]

**Supplementary Table 1:** Other cardiovascular conditions in the population of study during January 2017 to December 2017 stratified by sex.

| **Cardiovascular condition** | **Frequency (n;%)**  **N=1998** |
| --- | --- |
| Dilatation of cavities | 33 (1.7%) |
| Peripheral artery disease | 12 (0.6%) |
| Valve disease | 9 (0.5%) |
| Arrhythmia | 134 (6.7%) |
| Heart failure | 18 (0.9%) |
| Stable Angina | 86 (4.3%) |
| Aortic Aneurysm | 2 (0.1%) |
| Coronary multivessel disease | 47 (2.4%) |
| COPD | 21 (1.1%) |
| Cardiomyopathy | 33 (1.7%) |
| Deep Vein Thrombosis | 9 (0.5%) |
| Cerebrovascular disease | 48 (2.4%) |
| Others | 54 (2.7%) |

COPD= Chronic Obstructive Pulmonary Disease
